# Supplementary material
Source: MDPI journal article supplement (https://www.mdpi.com/2073-4433/13/12/2099)
Supplement: s1 [file s1]

# Supplementary Materials: PM<sub>2.5</sub>-Related Health Risk during Chinese Spring Festival in Taizhou, Zhejiang: The Health Impacts of COVID-19 Lockdown

Quanquan Wu <sup>1</sup>, Xianglian Wang <sup>2</sup>, Kai Ji <sup>3</sup>, Haibing Qiu <sup>3</sup>, Weiwei Feng <sup>1</sup>, Shan Huang <sup>1,\*</sup>, Ting Huang <sup>1</sup>, Jianlong Li <sup>1</sup> and Daishe Wu <sup>1</sup>

**Table S1.** Pollutant concentrations (µg/m<sup>3</sup>) and meteorological conditions during the CSF.

| CSF-2018                                 | SO <sub>2</sub> | CO<br>(mg/m <sup>3</sup> ) | NO <sub>2</sub> | O <sub>3</sub> _8h | RH(%) | Temp.<br>(°C) | Wind level |
|------------------------------------------|-----------------|----------------------------|-----------------|--------------------|-------|---------------|------------|
| 2018/2/5                                 | 14              | 1                          | 30              | 73                 | 42    | 1             | 1          |
| 2018/2/6                                 | 13              | 1                          | 34              | 80                 | 50    | 2             | 1          |
| 2018/2/7                                 | 10              | 1                          | 35              | 72                 | 64    | 3             | 1          |
| 2018/2/8                                 | 12              | 1                          | 36              | 98                 | 61    | 5             | 1          |
| 2018/2/9                                 | 6               | 1.2                        | 37              | 44                 | 86    | 4             | 1          |
| 2018/2/10                                | 5               | 1                          | 23              | 70                 | 81    | 7             | 2          |
| 2018/2/11                                | 6               | 0.8                        | 16              | 90                 | 58    | 5             | 1          |
| 2018/2/12                                | 7               | 0.8                        | 19              | 99                 | 63    | 4             | 1          |
| 2018/2/13                                | 9               | 0.8                        | 16              | 104                | 61    | 6             | 1          |
| 2018/2/14                                | 7               | 0.8                        | 18              | 91                 | 69    | 11            | 1          |
| 2018/2/15<br>(new year' eve)             | 6               | 0.7                        | 15              | 85                 | 74    | 12            | 1          |
| 2018/2/16<br>(Lunar new year)            | 6               | 0.6                        | 8               | 67                 | 75    | 10            | 1          |
| 2018/2/17                                | 5               | 0.5                        | 7               | 98                 | 66    | 9             | 2          |
| 2018/2/18                                | 5               | 0.6                        | 14              | 93                 | 71    | 12            | 1          |
| 2018/2/19                                | 4               | 0.6                        | 11              | 63                 | 79    | 12            | 1          |
| 2018/2/20                                | 3               | 0.6                        | 10              | 67                 | 87    | 9             | 1          |
| Ave.                                     | 7.38            | 0.81                       | 20.56           | 80.88              | 68    | 7             |            |
| Std.                                     | 3.28            | 0.20                       | 10.53           | 16.58              | 12.42 | 3.76          |            |
| CSF-2020                                 | SO <sub>2</sub> | CO<br>(mg/m <sup>3</sup> ) | NO <sub>2</sub> | O <sub>3</sub> _8h | RH(%) | Temp.<br>(°C) | Wind level |
| 2020/1/18                                | 3               | 0.6                        | 13              | 60                 | 64    | 6             | 1          |
| 2020/1/19                                | 4               | 0.8                        | 21              | 52                 | 70    | 6             | 1          |
| 2020/1/20                                | 4               | 0.8                        | 23              | 97                 | 76    | 6             | 1          |
| 2020/1/21                                | 6               | 0.9                        | 24              | 111                | 72    | 9             | 1          |
| 2020/1/22                                | 5               | 0.9                        | 24              | 90                 | 74    | 14            | 1          |
| 2020/1/23                                | 3               | 1                          | 15              | 73                 | 89    | 12            | 1          |
| 2020/1/24<br>(new year' eve)<br>lockdown | 4               | 0.6                        | 12              | 72                 | 89    | 10            | 1          |
| 2020/1/25<br>(Lunar new year)            | 3               | 0.6                        | 8               | 82                 | 88    | 9             | 2          |
| 2020/1/26                                | 2               | 0.3                        | 6               | 55                 | 90    | 9             | 2          |
| 2020/1/27                                | 2               | 0.3                        | 4               | 79                 | 66    | 9             | 2          |
| 2020/1/28                                | 3               | 0.5                        | 4               | 73                 | 61    | 8             | 2          |
| 2020/1/29                                | 3               | 0.5                        | 5               | 85                 | 54    | 7             | 2          |
| 2020/1/30                                | 4               | 0.6                        | 6               | 92                 | 58    | 6             | 1          |
| 2020/1/31                                | 5               | 0.7                        | 8               | 106                | 56    | 6             | 1          |
| 2020/2/1                                 | 4               | 0.5                        | 8               | 105                | 67    | 6             | 1          |
| 2020/2/2                                 | 3               | 0.4                        | 7               | 96                 | 71    | 9             | 1          |
| 2020/2/3                                 | 4               | 0.4                        | 7               | 98                 | 75    | 9             | 1          |
| 2020/2/4                                 | 2               | 0.6                        | 8               | 84                 | 91    | 8             | 1          |
| 2020/2/5                                 | 4               | 0.4                        | 6               | 112                | 66    | 9             | 1          |

|           |      |      |      |       |       |      |   |
|-----------|------|------|------|-------|-------|------|---|
| 2020/2/6  | 2    | 0.3  | 5    | 86    | 81    | 7    | 1 |
| 2020/2/7  | 2    | 0.3  | 4    | 75    | 83    | 7    | 2 |
| 2020/2/8  | 2    | 0.4  | 4    | 78    | 70    | 7    | 1 |
| 2020/2/9  | 3    | 0.5  | 6    | 89    | 70    | 7    | 1 |
| 2020/2/10 | 3    | 0.5  | 6    | 102   | 73    | 8    | 1 |
| 2020/2/11 | 3    | 0.5  | 11   | 70    | 87    | 11   | 0 |
| 2020/2/12 | 3    | 0.5  | 10   | 64    | 92    | 14   | 1 |
| Ave.      | 3.31 | 0.55 | 9.81 | 84.08 | 74.35 | 8.42 |   |
| Std.      | 1.05 | 0.20 | 6.41 | 16.70 | 11.50 | 2.30 |   |
